# Supplementary material
Source: PubMed Central journal article supplement (PMC7426884)
Supplement: jama-e2015543-s004.pdf [file jama-e2015543-s004.pdf]

## Data Sharing Statement

Xia. Effect of an Inactivated Vaccine Against SARS-CoV-2 on Safety and Immunogenicity Outcomes. *JAMA*. Published August 13, 2020. 10.1001/jama.2020.15543

### Data

**Data available:** No

### Additional Information

**Explanation for why data not available:** There are interim data and it would not be appropriate to share individual level data at this time, but we are willing to share all de-identified data after the trial is formally finished after 1-year follow-up.
